# Supplementary material
Source: PubMed Central journal article supplement (PMC4608026)
Supplement: NIHMS728486-supplement-Supplemental.pdf [file NIHMS728486-supplement-Supplemental.pdf]

## SUPPLEMENTARY MATERIAL

### The Combination of Pill Count and Self-Reported Adherence is a Strong Predictor of First-Line ART Failure for Adults in South Africa

Peng Wu<sup>1</sup>, Brent A. Johnson<sup>1</sup>, Jean B. Nachega<sup>2,3,4</sup>, Baohua Wu<sup>1</sup>, Claudia E. Ordóñez<sup>5</sup>,  
Anna Q. Hare<sup>6</sup>, Rachel Kearns<sup>1</sup>, Richard Murphy<sup>7</sup>, Henry Sunpath<sup>5,8</sup> and Vincent C. Marconi<sup>1,6,9</sup>

<sup>1</sup>Rollins School of Public Health, Emory University, Atlanta, Georgia, USA; <sup>2</sup>Department of Epidemiology, Pittsburgh University Graduate School of Public Health, Pittsburgh, Pennsylvania, USA; <sup>3</sup>Departments of Epidemiology and International Health, Johns Hopkins Bloomberg School of Public Health, Baltimore, Maryland, USA; <sup>4</sup>Department of Medicine and Centre for Infectious Diseases, Stellenbosch University, Faculty of Medicine & Health Sciences, Cape Town, South Africa; <sup>5</sup>McCord Hospital, Durban, South Africa; <sup>6</sup>Emory University School of Medicine, Atlanta, Georgia, USA; <sup>7</sup>Albert Einstein College of Medicine and Medical Unit, Doctors Without Borders, New York, New York, USA; <sup>8</sup>Infectious Diseases Unit, Nelson Mandela School of Medicine, University of KwaZulu-Natal, Durban, South Africa; <sup>9</sup>Atlanta Veterans Affairs Medical Center, Atlanta, Georgia, USA

**Supplemental Table 1. “Antiretroviral Hierarchy”.**

| Drugs <sup>£</sup> | Name                         |
|--------------------|------------------------------|
| 1. EFV             | Efavirenz                    |
| 2. TDF             | Tenofovir DisoproxilFumarate |
| 3. FTC/TDF         | Emtricitabine and Tenofovir  |
| 4. FTC             | Emtricitabine                |
| 5. 3TC             | Lamivudine                   |
| 6. 3TC/ZDV         | Lamivudine and Zidovudine    |
| 7. ZDV             | Zidovudine (Azidothymidine)  |
| 8. 3TC/ABC         | Lamivudine and Abacavir      |
| 9. d4T             | Stavudine                    |
| 10. ddI            | Didanosine                   |
| 11. LPV/r          | Lopinavir and Rionavir       |
| 12. ABC            | Abacavir                     |

<sup>£</sup> Antiretroviral in order by hierarchy rank.

Supplemental Table 2. Self-reported questions.

| Questions                                                                                                          | Response Options (Score Recorded) |            |               |                |
|--------------------------------------------------------------------------------------------------------------------|-----------------------------------|------------|---------------|----------------|
| 1. How many doses have you missed in the last week?                                                                |                                   |            |               |                |
| 2. How many doses have you missed in the last month?                                                               |                                   |            |               |                |
| 3. How many doses did you take more than 1 hour late in the last week?                                             |                                   |            |               |                |
| 4. How many doses did you take more than 1 hour late in the last month?                                            |                                   |            |               |                |
| 5. How do you remember to take your meds? (choice=Cell phone (3))                                                  | No (0)                            | Yes (1)    |               |                |
| 6. How do you remember to take your meds? (choice=Media (TV/Radio) (7))                                            | No (0)                            | Yes (1)    |               |                |
| 7. How do you remember to come for your drug collection appointment? (choice=Cellphone (3))                        | No (0)                            | Yes (1)    |               |                |
| In the past 6 months, which of the following reasons make it difficult for you to take ARVs (show scale and rank)? |                                   |            |               |                |
| 8. You were away from home?                                                                                        | Never (0)                         | Rarely (1) | Sometimes (2) | Frequently (3) |
| 9. You were busy with other things?                                                                                | Never (0)                         | Rarely (1) | Sometimes (2) | Frequently (3) |
| 10. You fell asleep through dose time?                                                                             | Never (0)                         | Rarely (1) | Sometimes (2) | Frequently (3) |
| 11. You ran out of pills?                                                                                          | Never (0)                         | Rarely (1) | Sometimes (2) | Frequently (3) |
| 12. You forgot to take pills?                                                                                      | Never (0)                         | Rarely (1) | Sometimes (2) | Frequently (3) |
| 13. You had wanted to avoid side effects?                                                                          | Never (0)                         | Rarely (1) | Sometimes (2) | Frequently (3) |

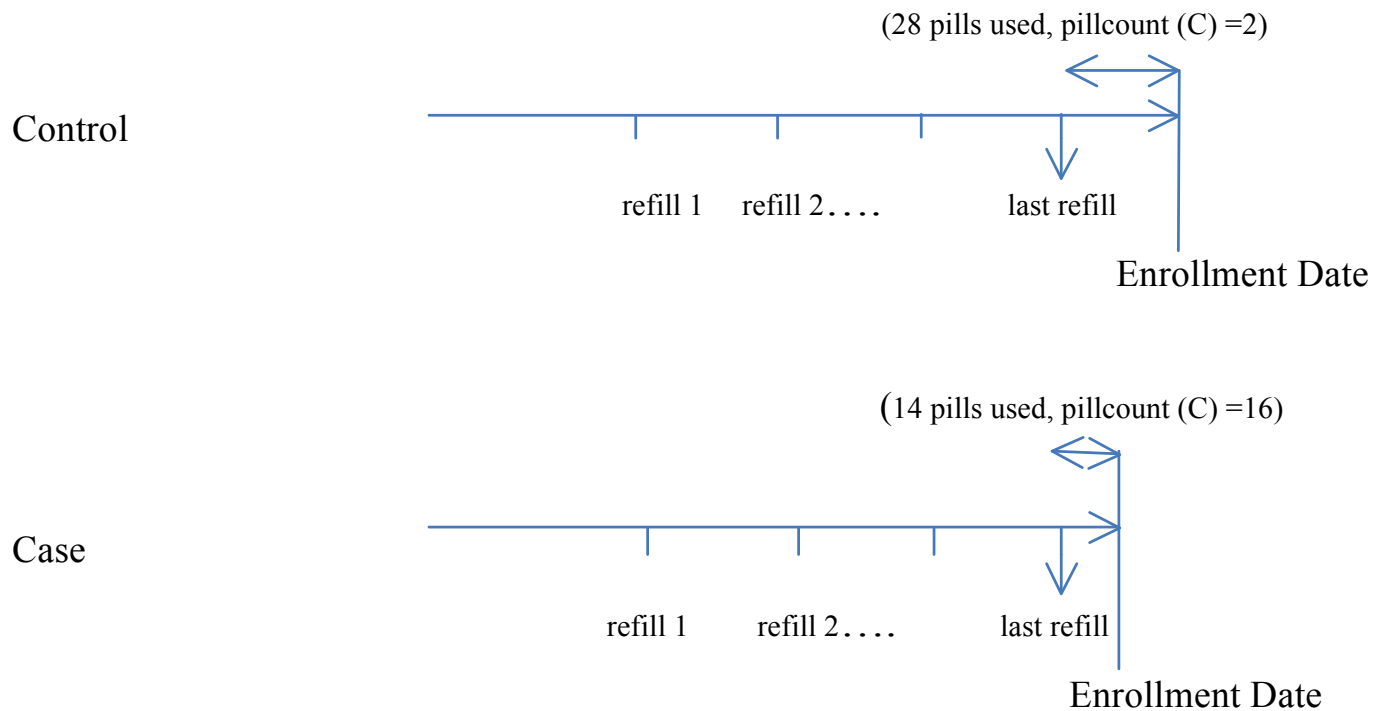

Supplemental Fig. (1). Pharmacy Refill Claims.
